# Supplementary material for: Strengthening Routine Data Systems to Track the HIV Epidemic and Guide the Response in Sub-Saharan Africa
Source: PubMed Central journal article supplement (PMC5904448; doi:10.2196/publichealth.9344), 2018-04-03
Supplement: publichealth_v4i2e36_app1.pdf [file publichealth_v4i2e36_app1.pdf]

| Priorities                                                                                                       | Recommendations                                                                                                                                                                                                                   | Exemplar                                                                                                                                                                                                                                                                                                                                                                                                                                                                                             |
|------------------------------------------------------------------------------------------------------------------|-----------------------------------------------------------------------------------------------------------------------------------------------------------------------------------------------------------------------------------|------------------------------------------------------------------------------------------------------------------------------------------------------------------------------------------------------------------------------------------------------------------------------------------------------------------------------------------------------------------------------------------------------------------------------------------------------------------------------------------------------|
| Strengthen individualized HIV data systems that support continuity of clinical care and document sentinel events | <p>Track patients within and across programs</p> <p>Develop unique universal personal identifiers whilst ensuring confidentiality</p>                                                                                             | <p>Develop case surveillance</p> <p>Develop / implement civil identification numbers, national health identifiers and master patient indexes</p>                                                                                                                                                                                                                                                                                                                                                     |
| Utilize data from HIV testing platforms                                                                          | <p>Re-focus on data systems for new diagnoses</p> <p>Incorporate data from multiple testing platforms</p> <p>Employ recency assays</p>                                                                                            | <p>Utilize site specific routine testing data</p> <p>Exploit facility, community and home-based testing platforms, key population outreach and self-testing programs</p> <p>Pilot test in a range of service-provision contexts including PMTCT, testing and counseling facilities, and outreach testing services</p>                                                                                                                                                                                |
| Targeted routine data collection among communities and clients                                                   | <p>Systematize key population surveillance</p> <p>Identify populations with greatest needs and develop tools to guide service provision</p>                                                                                       | <p>Assess strengths and limitations of different sampling methods</p> <p>Implement community-based surveys that appraise risk across sub-groups</p>                                                                                                                                                                                                                                                                                                                                                  |
| Build capacity and promote a culture of HIV data quality assessment and use                                      | <p>Encourage responsibility for data quality at the local level</p> <p>Evaluate data quality at the sub-national, national and global level</p> <p>Develop procedural documents</p> <p>Consider timeliness of HIV data cycles</p> | <p>Engage frontline data staff in promoting effective record keeping</p> <p>Develop and promote robust data quality feedback loops in existing systems of reporting between facilities and health departments</p> <p>Specify processes for conducting ongoing data quality assessment and for dealing with errors</p> <p>For surveillance activities identify the minimum period required for conducting data collection and quality improvement, and producing and reviewing meaningful outputs</p> |
